# 1 Children with tungiasis in Kenya have poor school performance and 2 quality of life.

3 Lynne Elson<sup>1,2</sup>, Christopher Kamau<sup>3</sup>, Sammy Koech<sup>4</sup>, Christopher Muthama<sup>5</sup>, George Gichomba<sup>6</sup>,  
4 Erastus Sinoti<sup>7</sup>, Elwyn Chondo<sup>8</sup>, Eliud Mburu<sup>9</sup>, Miriam Wakio<sup>10</sup>, Jimmy Lore<sup>11</sup>, Marta Maia<sup>1,2</sup>, Ifedayo  
5 Adetifa<sup>1,12</sup>, Benedict Orindi<sup>1</sup>, Phillip Bejon<sup>1,2</sup>, Ulrike Fillinger<sup>13</sup>

6  
7 <sup>1</sup>Kenya Medical Research Institute (KEMRI)-Wellcome Trust, Kilifi, Kenya,

8 <sup>2</sup>Nuffield Department of Medicine, University of Oxford,

9 Departments of Health in <sup>3</sup>Muranga, <sup>4</sup>Kericho, <sup>5</sup>Makueni, <sup>6</sup>Nakuru, <sup>7</sup>Samburu, <sup>8</sup>Kilifi, <sup>9</sup>Kajiado, <sup>10</sup>Taita

10 Taveta, <sup>11</sup>Turkana,

11 <sup>12</sup> London School of Hygiene & Tropical Medicine, Keppel Street, London, UK,

12 <sup>13</sup>International Centre for Insect Physiology and Ecology (icipe) Kenya.

13

## 14 \*Correspondence

15 [lynne.elson@gmail.com](mailto:lynne.elson@gmail.com)

## 16 Keywords

17 Tungiasis, *NTDs*, quality of life, academic achievement

18

## 19 Abstract

20 Tungiasis is a highly neglected tropical skin disease caused by the sand flea, *Tunga penetrans*. The  
21 flea burrows into the skin inducing a strong inflammatory response, leading to chronic pain and  
22 discomfort with potential impacts on quality of life. Few countries implement control efforts and  
23 there are few data on the impact of the disease to support policy decisions. We conducted a survey  
24 to determine the impact of tungiasis among primary school children across nine counties of Kenya.

**NOTE: This preprint reports new research that has not been certified by peer review and should not be used to guide clinical practice.**

25 A total of 10,600 pupils aged 8 to 14 years were randomly selected from 97 primary schools  
26 and examined for tungiasis. Those with tungiasis (83) were interviewed with respect to their quality  
27 of life using a modified dermatological quality of life index. For these cases and 576 randomly  
28 selected controls, school attendance and exam scores for maths, English and science were collected  
29 from school records. Mixed effect ordered logistic and linear models were used to assess  
30 associations between disease status and impact variables.

31 Compared to uninfected pupils, those with tungiasis missed more days of school (adjusted  
32 Incidence Rate Ratio (aIRR: 1.50, 95% CI: 1.03–2.21) and were less likely to receive a high score in  
33 maths (aOR 0.18, 95% CI: 0.08–0.40) and other subjects. Pupils with severe disease (>10 fleas) were  
34 five times more likely to experience severe pain and itching than those with mild disease (OR 5.0,  
35 95% CI: 2.55–10.51) and a higher category of impact on their quality of life than those with mild  
36 disease (aOR 3.52, 95% CI: 1.22–10.17) when adjusted for covariates.

37 This study has demonstrated tungiasis has a considerable impact on children's lives and  
38 academic achievement, equivalent to other diseases. This indicates the need for integrated disease  
39 management for school-aged children to protect their physical and cognitive development and their  
40 future prospects.

41

## 42 [Author Summary](#)

43 Tungiasis is one of the most neglected tropical diseases (NTDs). It is caused by a flea which  
44 burrows into the skin of the feet. The neglect has resulted in large gaps in our knowledge of the  
45 disease, how to treat and prevent infection. This is partly due to a lack of appreciation for the impact  
46 the disease has on patients' lives by health officials, policymakers and the research community. In  
47 this study we aimed to determine the impact on school children in nine counties of Kenya. We found  
48 evidence that children experience considerable pain and itching which affects their ability to attend  
49 school and to concentrate on their classes. They had lower exam scores in maths, English and  
50 science than uninfected children. This study has provided evidence that tungiasis is a disease that

51 affects children just as much as other diseases and urgently needs more attention from researchers,  
52 donors, and policy makers. Integrating tungiasis into comprehensive disease management for  
53 school-aged children will protect their physical and cognitive development and their future  
54 prospects.

55

## 56 Introduction

57 Tungiasis is a highly neglected tropical skin disease which is widespread across sub-Saharan Africa[1].  
58 In Kenya, human tungiasis is considered a significant individual and public health threat, with a  
59 national prevalence of 1.3% among children aged 8 to 14 years [2]. In selected communities,  
60 prevalence can reach as high as 64%, as in north-eastern Uganda [3-6]. Children under 15 years,  
61 elderly people and people with disabilities carry the highest disease burden [7].

62 Tungiasis is caused by female adult sand fleas (*Tunga penetrans*) which penetrate the skin of  
63 their mammalian hosts and stay embedded in one spot in the epidermis to mature and produce eggs  
64 [8]. The flea causes extensive morbidity resulting from an intense inflammatory response around the  
65 rapidly growing sand fleas [9]. The inflammation is further intensified by frequent bacterial  
66 superinfection and may result in tetanus, gangrene or septicemia[10]. The vast majority of the  
67 embedded sand fleas are located in the feet[1].

68 Little is known about the impact of tungiasis infection on a patient's quality of life. The  
69 inflammation, pain and itching have been reported to affect children's ability to sleep[9], walk[9, 11],  
70 attend school [12] and pay attention in class, thus reducing their school performance[12], but this  
71 has not been studied systematically. It was previously demonstrated in a small group of patients that  
72 tungiasis significantly impacts a child's Quality of Life using the Dermatological Quality of Life Index  
73 (DLQI) modified to focus on a parasitic skin disease of the feet (TmDLQI) [13].

74           The objectives of this study were to determine the impact of tungiasis on children's quality  
75 of life, on their school attendance and on their academic achievement in primary schools from nine  
76 counties of Kenya.

77

## 78   Methods

### 79   Study Population

80   This study was a cross-sectional survey embedded in a national level prevalence survey reported  
81 previously[2]. The survey was conducted in nine counties of Kenya, purposively selected to  
82 represent the five major climatic zones, cultures and geography of the country: Turkana, Samburu,  
83 Kericho, Nakuru, Muranga, Kajiado, Makueni, Taita Taveta and Kilifi. Within each county 22 primary  
84 schools were stratified randomly selected from pre-existing school list for each sub-county. The  
85 schools were surveyed in two phases, 11 schools per county in survey 1 from May to July 2021, and a  
86 different group of 11 schools in survey 2 from October 2021 to April 2023. Within each selected  
87 school an equal number of boys and girls were quasi-randomly selected by asking the pupils to  
88 assemble in three age groups; 8 and 9 years; 10 and 11 years; 12 to 14 years, and by sex within each  
89 age group. For each of these age/sex groups, every  $n^{\text{th}}$  pupil ( $n = \text{total number in the group} / 19$ ) was  
90 selected until 19 were selected, giving a total of 114 pupils overall.

91           All pupils were then asked to assent to a careful examination of their hands and feet for  
92 embedded *Tunga penetrans* fleas [2]. All infected pupils were also asked how much pain and how  
93 much itching they experienced in the past one week from the embedded fleas. They were asked to  
94 score this as either none, a little, some or a lot.

### 95   Impact study sample size

96   The sample size for the impact assessments was based on a previous study on the impact of *Trichuris*  
97 infection on school absenteeism[14]. Children who were infected were absent from school for 28%  
98 of the school year, while uninfected children were absent for only 12% of the year. The sample size

99 needed to detect this difference with 90% power and 95% confidence interval and a case: control  
100 ratio of 2, was 102 cases and 208 controls (Open Epi version 3). However, since we did not know if  
101 the impact would be as great as for trichuriasis, we applied a design effect of 2 for a total sample of  
102 204 cases and 416 controls. This sample was spread across the nine counties and the 11 schools in  
103 each county, so that 3 cases and 6 controls were to be enrolled for each of 11 schools in each county  
104 to a total of 297 cases and 594 controls.

#### 105 Selection procedure

106 During survey 2, after the 114 pupils had been examined and their tungiasis infection status  
107 determined, six uninfected pupils were randomly selected using the lottery method. Every infected  
108 pupil identified was enrolled.

#### 109 Outcome variables

110 **Anthropometrics.** Measurements of pupils' height and weight were taken using a tape measure and  
111 simple weighing scales, ensuring they were placed on a flat surface. From these height-for-age and  
112 weight-for-age z scores were calculated using the "zanthro" extension for Stata with the UK-WHO  
113 Term Growth Charts for adolescents provided[15].

114 **School attendance and academic achievement.** School attendance and exam records for the  
115 previous school term were provided by the teachers and searched for the selected pupils. Data were  
116 extracted on the number of days pupils were absent in the whole of the previous term as well as  
117 their exam results in math, English and science. The schools recorded exam scores differently for  
118 different school grades, a simple score of 0 to 4 for the lower grades, that is, one to four but an  
119 actual percentage mark for the upper grades, five to eight.

120 **School grade delay** variable was created as follows. First, expected age in years for each school  
121 grade; grade 1 being 6.5, grade 2 being 7.5, grade 3 being 8.5 was created. Next, age difference was  
122 calculated for each pupil as a pupil's age minus the expected age for his/her grade. This was then  
123 collapsed into a binary variable; 1 for any pupil who was more than 1.0 years older than the  
124 expected age for their grade and 0 for all others.

125 **Pain and itching.** All infected pupils were asked to score how much pain and how much itching they  
126 experienced in the past one week from the embedded fleas in their feet on a 4-point Likert scale of  
127 “none” (=0), “a little” (=1), “some” (=2), and “a lot” (=3).

128 **Quality of Life.** All infected pupils were interviewed following the Children’s Dermatological Quality  
129 of Life index (CDLQI)[16] previously modified for a skin disease of the feet, the Tungiasis modified  
130 Dermatological Quality of Life Index (TmDLQI) [13] and further modified with two additional  
131 questions added. Previous questions included: mobility, sleep, concentration in school, friendships,  
132 bullying and shame (six domains). We added feelings of anger and sadness to a total of eight  
133 domains. The instrument asked how much each of these was impacted by the embedded fleas in the  
134 past one week, scored on a 4-point Likert scale of “none” (=0), “a little” (=1), “some” (=2), and “a lot”  
135 (=3). An overall TmDLQI score was obtained by summing responses to all questions with a maximum  
136 of 24 for each pupil. As conducted with the previous mDLQI, the scores were then collapsed into  
137 quintiles (categories of impact) with thresholds based on a frequency histogram (S3, Supporting  
138 Information) and Waters et al [17]: 0–1 no impact, 2–5 small impact, 6–10 moderate, 11–15 large,  
139 16–24 very large impact. The instrument was translated into Kiswahili. The tool was pre-tested and  
140 necessary adjustments made prior to the main survey.

141

#### 142 Explanatory variables

143 The main explanatory variable was disease severity assigned for each infected pupil as described  
144 previously[18] summing all the clinical signs into a clinical score and then dichotomised such that a  
145 pupil having a clinical score less than 11 being a mild case, and a pupil with a clinical score more than  
146 10 being a severe case.

147 Other explanatory variables were county, school location (urban/ rural), school type (public/  
148 private), pupil age, sex, disability, other skin abnormality, socioeconomic status (SES; as described  
149 previously[19]), adults the pupil lives with (both parents/ others), who the main caregiver is  
150 (mother/ other), mother’s school level attained (none/ primary/ secondary/ don’t know), father

151 away a lot, mother away a lot, parents attend school meetings (never/sometimes/always), parents  
152 make sure pupils completes homework (never/sometimes/always), chronically ill family member,  
153 family member disabled, pupil missed school to help at home, pupil sleeps in parents' house,  
154 number of people sleep in room with pupil.

155

## 156 Data Analysis

157 All analyses were conducted in Stata IC version 15.1 (Stata Corp LLC, College Station, Texas, USA).  
158 First, we described the participants by their background characteristics and disease status. Next,  
159 univariable mixed effect models were fitted for outcome and all the explanatory variables. Height-  
160 for-age and weight-for-age were also included as covariates in models for the other five outcomes.  
161 Only covariates with a p-value below 0.200 were included in the multivariable models and stepwise  
162 backward elimination used to reach the final models with the lowest Akaike Information Criteria  
163 (AIC). Significance of categorical variables in the final model were confirmed using Wald Chi tests.  
164 Results for the final models are presented in the main body of the manuscript while univariable  
165 analyses are presented in the supplementary material, additional file 2. School was included as a  
166 random effect in all models. Depending on the nature of the outcome, we fitted either a linear  
167 mixed effects model (anthropometrics, academic achievement for upper grade), a negative binomial  
168 mixed effects model (absenteeism), a logit mixed effects model (school grade delay) or ordered logit  
169 mixed effects model (academic achievement for lower grade, pain and itching, and TmDLQI  
170 quintiles).

171 To identify the quality-of-life domain most affected by tungiasis the percent of infected  
172 pupils scoring a 2 or 3 for each domain was calculated. A two-level ordered logistic regression  
173 analysis with school as a random effect was used to test for association of each domain with disease  
174 severity. We performed these analyses under the valid missing at random assumption, as we used  
175 likelihood approaches [20].

176

## 177 Results

### 178 Study Population

179 A total of 659 pupils from nine counties were enrolled and analysed. The majority (585) of these  
180 pupils were from public schools and rural areas (577). The median age was 11 years (IQR 9–13) and  
181 50.9% were boys. Only 83 (12.6%) pupils had tungiasis, 10 (1.5%) were disabled and 42 (6.4%) had  
182 some other skin abnormality. There were no pupils with tungiasis in the private schools (Additional  
183 file 1 in supplementary material).

### 184 Anthropometrics

185 Of the 659 pupils, 117 (17.75%) were classified as underweight (weight-for-age z-score<-2.0) while  
186 47 (7.13%) were stunted (height-for-age z-score<-2.0). Of the 83 infected pupils, 32 (38.55%) were  
187 underweight and 10 (12.05%) were stunted (See supplementary table 1). Univariable mixed effect  
188 linear models for weight-for-age found a significant negative association with tungiasis status ( $\beta$  -  
189 0.65, 95% *CI*: -0.99–0.31). This negative association remained ( $\beta$  -0.41, 95% *CI*: -0.75–0.06) even  
190 when adjusted for other covariables, including SES, and whether a child lived with both parents  
191 (Table 1). There was no association of tungiasis with height-for-age ( $\beta$  -0.09, 95% *CI*: -0.47–0.28).

192



193 Table 1. Linear mixed effects regression analysis for nutrition status (weight-for-age z-scores)

| Variable                        | Category     | N <sup>1</sup> | UNIVARIABLE        |                     |       |                | MULTIVARIABLE MODEL         |                     |       |                |
|---------------------------------|--------------|----------------|--------------------|---------------------|-------|----------------|-----------------------------|---------------------|-------|----------------|
|                                 |              |                | Effect ( $\beta$ ) | 95% CI <sup>2</sup> |       | P <sup>3</sup> | Adjusted effect ( $\beta$ ) | 95% CI <sup>2</sup> |       | P <sup>3</sup> |
| Tungiasis status                | Uninfected   | 576            | 1                  |                     |       |                | 1                           |                     |       |                |
|                                 | Infected     | 83             | -0.65              | -0.99               | -0.31 | <0.001         | -0.41                       | -0.75               | -0.06 | 0.020          |
| County                          | Muranga      | 89             | 1                  |                     |       |                |                             |                     |       |                |
|                                 | Turkana      | 69             | 0.13               | -0.38               | 0.65  | 0.614          |                             |                     |       |                |
|                                 | Samburu      | 67             | -0.56              | -1.08               | -0.04 | 0.034          |                             |                     |       |                |
|                                 | Kericho      | 67             | 0.16               | -0.34               | 0.67  | 0.529          |                             |                     |       |                |
|                                 | Nakuru       | 74             | -0.20              | -0.70               | 0.30  | 0.434          |                             |                     |       |                |
|                                 | Kajiado      | 73             | 0.18               | -0.32               | 0.68  | 0.480          |                             |                     |       |                |
|                                 | Makueni      | 72             | 0.03               | -0.46               | 0.52  | 0.916          |                             |                     |       |                |
|                                 | Taita Taveta | 67             | 0.19               | -0.31               | 0.70  | 0.454          |                             |                     |       |                |
|                                 | Kilifi       | 81             | -0.86              | -1.37               | -0.35 | 0.001          |                             |                     |       |                |
|                                 | School type  | Public         | 585                | 1                   |       |                |                             |                     |       |                |
| Private                         |              | 74             | 0.57               | 0.17                | 0.98  | 0.005          |                             |                     |       |                |
| School location                 | Urban        | 82             | 1                  |                     |       |                |                             |                     |       |                |
|                                 | Rural        | 577            | -0.47              | -0.88               | -0.06 | 0.024          |                             |                     |       |                |
| Sex                             | Female       | 323            | 1                  |                     |       |                |                             |                     |       |                |
|                                 | Male         | 336            | -0.18              | -0.38               | 0.02  | 0.078          |                             |                     |       |                |
| Other skin disease              | No           | 617            | 1                  |                     |       |                |                             |                     |       |                |
|                                 | Yes          | 42             | -0.21              | -0.65               | 0.24  | 0.363          |                             |                     |       |                |
| TmDLQI <sup>4</sup>             |              |                | 0.04               | -0.03               | 0.11  | 0.245          |                             |                     |       |                |
| Number of days absent last term |              |                | 0.01               | -0.02               | 0.03  | 0.627          |                             |                     |       |                |
| SES <sup>5</sup>                |              |                | 0.66               | 0.43                | 0.90  | <0.001         | 0.60                        | 0.37                | 0.83  | <0.001         |
| Adults living with              | Both Parents | 473            | 1                  |                     |       |                | 1                           |                     |       |                |
|                                 | Others       | 186            | 0.35               | 0.11                | 0.58  | 0.004          | 0.26                        | 0.03                | 0.50  | 0.026          |
| Who cares for child             | Mother       | 504            | 1                  |                     |       |                |                             |                     |       |                |
|                                 | Others       | 153            | -0.06              | -0.30               | 0.18  | 0.617          |                             |                     |       |                |

|                              |            |     |       |       |      |       |
|------------------------------|------------|-----|-------|-------|------|-------|
| Mother's school level        | None       | 110 | 1     |       |      |       |
|                              | Primary    | 181 | 0.04  | -0.31 | 0.39 | 0.827 |
|                              | Secondary  | 254 | 0.03  | -0.32 | 0.37 | 0.881 |
|                              | Don't Know | 108 | -0.32 | -0.71 | 0.07 | 0.108 |
| Father away a lot            | No         | 270 | 1     |       |      |       |
|                              | Yes        | 225 | 0.00  | -0.24 | 0.23 | 0.970 |
| Mother away a lot            | No         | 410 | 1     |       |      |       |
|                              | Yes        | 173 | -0.01 | -0.26 | 0.25 | 0.960 |
| Number meals eaten yesterday | 1          | 49  | 1     |       |      |       |
|                              | 2          | 200 | -0.01 | -0.43 | 0.42 | 0.981 |
|                              | 3          | 392 | 0.05  | -0.36 | 0.47 | 0.802 |

194 <sup>1</sup> number, <sup>2</sup>confidence interval, <sup>3</sup> p-value, <sup>4</sup> tungiasis modified quality of life, <sup>5</sup> socio-economic status

195

196 Absenteeism

197 Records of the number of days a pupil was absent during the previous school term were recorded  
198 for 624 pupils, of whom 74 were infected. Univariable analyses found pupils with tungiasis missed  
199 nearly twice as many days of school than uninfected pupils (IRR: 1.87, 95% CI: 1.27–2.75), but many  
200 other covariates were also associated with absenteeism, that could account for this difference (Table  
201 2). When combined in a multivariable model, tungiasis infection was still associated, with infected  
202 pupils missing 1.5 times more days than uninfected pupils (aIRR: 1.50, 95% CI: 1.03–2.21) even when  
203 adjusted for county, age, SES, caregiver school level achieved and family disability (Table 2).

204

205 Table 2. Negative binomial regression for school absenteeism (number of days absent).

| Variable           | Category     | N <sup>1</sup> | Median (IQR <sup>2</sup> ) | IRR <sup>3</sup> | UNIVARIABLE         |       |                | MULTIVARIABLE     |                     |      |                |
|--------------------|--------------|----------------|----------------------------|------------------|---------------------|-------|----------------|-------------------|---------------------|------|----------------|
|                    |              |                |                            |                  | 95% CI <sup>4</sup> |       | P <sup>5</sup> | aIRR <sup>6</sup> | 95% CI <sup>4</sup> |      | P <sup>5</sup> |
| Tungiasis status   | No           | 550            | 1 (0-2)                    | 1                |                     |       |                | 1                 |                     |      |                |
|                    | Yes          | 74             | 2 (0-5.25)                 | 1.87             | 1.27                | 2.75  | 0.001          | 1.51              | 1.03                | 2.21 | 0.035          |
| County             | Taita taveta | 61             | 0 (0-2)                    | 1                |                     |       |                | 1                 |                     |      |                |
|                    | Turkana      | 69             | 5 (1-10.5)                 | 4.78             | 2.35                | 9.73  | <0.001         | 1.19              | 0.53                | 2.68 | 0.665          |
|                    | Samburu      | 64             | 0 (0-0)                    | 0.31             | 0.14                | 0.70  | 0.005          | 0.08              | 0.03                | 0.21 | <0.001         |
|                    | Kericho      | 66             | 1 (0-3.25)                 | 1.41             | 0.68                | 2.94  | 0.352          | 1.23              | 0.63                | 2.43 | 0.545          |
|                    | Muranga      | 86             | 1 (0-3)                    | 1.56             | 0.77                | 3.18  | 0.22           | 1.19              | 0.61                | 2.34 | 0.607          |
|                    | Nakuru       | 74             | 1 (0-4)                    | 1.61             | 0.78                | 3.31  | 0.198          | 1.32              | 0.68                | 2.56 | 0.415          |
|                    | Kajiado      | 69             | 1 (0-3)                    | 1.70             | 0.82                | 3.52  | 0.151          | 1.39              | 0.71                | 2.72 | 0.333          |
|                    | Makueni      | 71             | 1 (0-3)                    | 1.50             | 0.73                | 3.10  | 0.271          | 1.02              | 0.52                | 2.00 | 0.945          |
|                    | Kilifi       | 64             | 2 (0-4)                    | 2.54             | 1.17                | 5.50  | 0.018          | 0.94              | 0.44                | 2.01 | 0.878          |
| Sex                | Girls        | 304            | 1 (0-3)                    | 1                |                     |       |                |                   |                     |      |                |
|                    | Boys         | 320            | 1 (0-3.75)                 | 1.12             | 0.87                | 1.43  | 0.373          |                   |                     |      |                |
| Age                |              |                |                            | 0.90             | 0.84                | 0.96  | 0.001          | 0.93              | 0.87                | 0.99 | 0.022          |
| School grade/class | 8            | 57             | 0 (0-1.5)                  | 1                |                     |       |                |                   |                     |      |                |
|                    | 1            | 22             | 3.5 (1.75-10.5)            | 6.50             | 3.00                | 14.09 | <0.001         |                   |                     |      |                |
|                    | 2            | 80             | 1 (0-5)                    | 3.79             | 2.14                | 6.71  | <0.001         |                   |                     |      |                |
|                    | 3            | 96             | 1 (0-4)                    | 3.66             | 2.10                | 6.40  | <0.001         |                   |                     |      |                |
|                    | 4            | 89             | 1 (0-3)                    | 2.42             | 1.36                | 4.30  | 0.003          |                   |                     |      |                |
|                    | 5            | 97             | 1 (0-4)                    | 2.98             | 1.70                | 5.25  | <0.001         |                   |                     |      |                |
|                    | 6            | 90             | 1 (0-3)                    | 2.53             | 1.43                | 4.46  | 0.001          |                   |                     |      |                |
|                    | 7            | 93             | 0 (0-2)                    | 1.96             | 1.11                | 3.46  | 0.021          |                   |                     |      |                |
| Disability         | No           | 615            | 1 (0-3)                    | 1                |                     |       |                |                   |                     |      |                |
|                    | Yes          | 9              | 0 (0-5.5)                  | 1.08             | 0.40                | 2.91  | 0.873          |                   |                     |      |                |
| Other skin disease | No           | 586            | 1 (0-3)                    | 1                |                     |       |                |                   |                     |      |                |

|                            |                |     |            |      |      |      |        |      |      |      |        |
|----------------------------|----------------|-----|------------|------|------|------|--------|------|------|------|--------|
|                            | Yes            | 38  | 1 (0-3.25) | 0.93 | 0.54 | 1.58 | 0.776  |      |      |      |        |
| Height-for-age             |                |     |            | 1.01 | 0.93 | 1.11 | 0.753  |      |      |      |        |
| Weight-for-age             |                |     |            | 1.06 | 0.95 | 1.17 | 0.309  |      |      |      |        |
| SES <sup>7</sup> quintiles | 5              | 65  | 0 (0-1)    | 1    |      |      |        | 1    |      |      |        |
|                            | 1              | 90  | 1 (0-6)    | 4.43 | 2.38 | 8.27 | <0.001 | 3.86 | 1.95 | 7.66 | <0.001 |
|                            | 2              | 160 | 2 (0-5)    | 4.11 | 2.33 | 7.25 | <0.001 | 3.44 | 1.93 | 6.13 | <0.001 |
|                            | 3              | 133 | 1 (0-3)    | 2.59 | 1.47 | 4.56 | 0.001  | 2.37 | 1.37 | 4.10 | 0.002  |
|                            | 4              | 145 | 0 (0-2)    | 1.74 | 1.01 | 2.98 | 0.045  | 1.60 | 0.95 | 2.69 | 0.078  |
| Caregiver's schooling      | Some secondary | 246 | 0 (0-2)    | 1    |      |      |        | 1    |      |      |        |
|                            | None           | 100 | 2 (0-8)    | 2.27 | 1.47 | 3.51 | <0.001 | 2.05 | 1.20 | 3.49 | 0.008  |
|                            | Primary only   | 171 | 1 (0-3)    | 1.27 | 0.91 | 1.75 | 0.157  | 1.06 | 0.76 | 1.47 | 0.732  |
|                            | Don't know     | 102 | 1 (0-4)    | 1.49 | 1.01 | 2.19 | 0.045  | 1.25 | 0.84 | 1.85 | 0.266  |
| Family ill some months     | No             | 527 | 1 (0-3)    | 1    |      |      |        |      |      |      |        |
|                            | Yes            | 95  | 1 (0-3)    | 0.97 | 0.68 | 1.38 | 0.853  |      |      |      |        |
| Family disability          | No             | 584 | 1 (0-3)    | 1    |      |      |        | 1    |      |      |        |
|                            | Yes            | 34  | 2 (0-6)    | 1.67 | 1.00 | 2.78 | 0.049  | 1.61 | 0.97 | 2.67 | 0.066  |
| Source income job          | No             | 480 | 1 (0-4)    |      |      |      |        |      |      |      |        |
|                            | Yes            | 144 | 0 (0-2)    | 0.57 | 0.41 | 0.80 | 0.001  |      |      |      |        |
| Sleep in parent house      | Yes            | 498 | 1 (0-3)    | 1    |      |      |        |      |      |      |        |
|                            | No             | 125 | 1 (0-5)    | 0.84 | 0.61 | 1.16 | 0.288  |      |      |      |        |
| Adults living with         | Both parents   | 456 | 1 (0-3)    | 1    |      |      |        |      |      |      |        |
|                            | Others         | 168 | 1 (0-3.5)  | 0.91 | 0.68 | 1.21 | 0.505  |      |      |      |        |
| Who cares for child        | Mother         | 482 | 1 (0-4)    | 1    |      |      |        |      |      |      |        |
|                            | Other          | 141 | 1 (0-3)    | 1.00 | 0.74 | 1.37 | 0.978  |      |      |      |        |

206 <sup>1</sup> number, <sup>2</sup> interquartile range <sup>3</sup> incidence rate ratio, <sup>4</sup> confidence interval, <sup>5</sup> p-value, <sup>6</sup> adjusted incidence rate ratio, <sup>7</sup> socio-economic status

207

208 School performance

209 Of the 659 pupils, exam results were obtained for 619 of whom 273 were from the lower grades  
210 with a median age of 9 years (IQR 8-10.5 years), for whom results were scored on a Likert-type scale  
211 of 0 to 4. Another 346 pupils were from the upper grades with a median age of 12 years (IQR 11-14  
212 years) for whom actual percentage exam results were obtained.

213 For the lower classes the regression models indicated pupils with tungiasis had five times  
214 lower odds of achieving the higher scores compared to uninfected pupils (maths aOR 0.18, 95% CI:  
215 0.08–0.40, English aOR 0.19, 95% CI: 0.08–0.44, and science aOR 0.20, 95% CI: 0.09–0.44), even  
216 when adjusted for age, disability, the number of days absent from school in the past term, SES,  
217 whether the mother was away a lot and the height-for-age z-scores (Table 3). There was no  
218 association of school type (public or private) nor weight-for-age z-scores with any subject exam  
219 results in this age group.

220 Table 3. Panel Ordered Logistic Regression analysis of school exam results for Maths, Science and English for pupils in grade 1 to 4. (Univariable tables in  
 221 Supporting Information S2)

| Variable          | Category   | N <sup>1</sup> | MATHS                                   |                | SCIENCE          |        | ENGLISH          |        |
|-------------------|------------|----------------|-----------------------------------------|----------------|------------------|--------|------------------|--------|
|                   |            |                | aOR <sup>2</sup> (95% CI <sup>3</sup> ) | P <sup>4</sup> | aOR (95% CI)     | P      | aOR (95% CI)     | P      |
| Tungiasis status  | Uninfected | 219            | 1                                       |                | 1                |        | 1                |        |
|                   | Infected   | 54             | 0.18 (0.08–0.39)                        | <0.001         | 0.20 (0.09–0.44) | <0.001 | 0.19 (0.08–0.43) | <0.001 |
| Age               |            |                | -                                       |                | -                |        | 1.21 (0.98–1.48) | 0.077  |
| Disability        | No         | 268            |                                         |                | 1                |        | 1                |        |
|                   | Yes        | 5              |                                         |                | 0.22 (0.03–1.55) | 0.128  | 0.04 (0.00–0.45) | 0.009  |
| Height-for-age    |            |                | 0.84 (0.72–0.99)                        | 0.039          | -                |        | -                |        |
| Days absent       |            |                | 0.94 (0.89–1.00)                        | 0.049          | 0.97 (0.91–1.03) | 0.252  | 0.94 (0.87–1.00) | 0.064  |
| SES <sup>4</sup>  |            |                | 1.20 (0.63–2.30)                        | 0.649          | 1.53 (0.77–3.03) | 0.222  | 2.33 (1.14–4.73) | 0.020  |
| Mother away a lot | No         | 167            | 1                                       |                | 1                |        | 1                |        |
|                   | Yes        | 74             | 1.96 (1.03–3.72)                        | 0.040          | 1.98 (1.02–3.86) | 0.045  | 1.47 (0.75–2.90) | 0.262  |

222 <sup>1</sup> number, <sup>2</sup> adjusted odds ratio <sup>3</sup> confidence interval, <sup>4</sup> p-value, <sup>4</sup> socio-economic status

223           The association of school performance with tungiasis was not found for the older pupils in  
224 the upper grades, the other independent variables being more strongly associated (Table 4). For  
225 each exam subject a different set of variables were associated, but common to all and most strongly  
226 associated for all subjects was attending a private school rather than a public school. Repeating the  
227 analyses for pupils in the public schools only, did not change the lack of association of tungiasis with  
228 exam results for the older pupils (data not shown).



229

230 Table 4. Linear Regression analysis of school exam results in Maths, Science and English for pupils in grade 5 to 8. (see Univariable tables in Supporting  
 231 Information S2).

| Variable                       | Category     | N <sup>1</sup> | MATHS                         |                | SCIENCE             |        | ENGLISH              |        |
|--------------------------------|--------------|----------------|-------------------------------|----------------|---------------------|--------|----------------------|--------|
|                                |              |                | $\beta$ (95% CI) <sup>2</sup> | P <sup>3</sup> | $\beta$ (95% CI)    | P      | $\beta$ (95% CI)     | P      |
| Tungiasis status               | Uninfected   | 326            | 1                             |                | 1                   |        | 1                    |        |
|                                | Infected     | 20             | -8.52 (-17.03– -0.02)         | 0.050          | -6.03 (-15.45–3.40) | 0.210  | -4.57 (-12.20–3.07)  | 0.241  |
| School type                    | Public       | 301            | 1                             |                | 1                   |        | 1                    |        |
|                                | Private      | 45             | 15.39 (7.73–23.04)            | <0.001         | 18.06 (8.82–27.30)  | <0.001 | 8.96 (3.17–14.74)    | 0.002  |
| School location                | Urban        | 45             |                               |                | 1                   |        |                      |        |
|                                | Rural        | 301            |                               |                | 8.81 (-0.22–17.84)  | 0.056  |                      |        |
| Age                            |              |                |                               |                |                     |        | -2.72 (-3.91– -1.54) | <0.001 |
| Weight-for-age                 |              |                |                               |                |                     |        | -1.18 (-2.74–0.38)   | 0.138  |
| Days absent                    |              |                |                               |                | -0.49 (-1.14–0.16)  | 0.142  | -0.51 (-1.10–0.08)   | 0.091  |
| SES <sup>4</sup>               |              |                | 4.07 (-1.03–9.16)             | 0.117          | 3.80 (-2.10–9.70)   | 0.206  | 7.47 (2.44–12.50)    | 0.004  |
| Adults living with             | Both parents | 249            |                               |                |                     |        | 1                    |        |
|                                | Other        | 97             |                               |                |                     |        | 4.04 (0.25–7.84)     | 0.037  |
| Mother schooling level         | None         | 65             | 1                             |                | 1                   |        | 1                    |        |
|                                | Primary      | 98             | -5.38 (-11.37–0.61)           | 0.078          | -5.74 (-12.44–0.96) | 0.093  | -0.69 (-6.37–4.98)   | 0.811  |
|                                | Secondary    | 138            | -1.46 (-7.90–4.99)            | 0.658          | 0.18 (-7.23–7.59)   | 0.962  | 1.39 (-4.71–7.49)    | 0.655  |
|                                | Don't know   | 42             | -1.20 (-8.08–5.67)            | 0.732          | 2.05 (-5.97–10.07)  | 0.616  | 0.71 (-5.80–7.22)    | 0.831  |
| Father away a lot              | No           | 145            |                               |                | 1                   |        |                      |        |
|                                | Yes          | 118            |                               |                | 2.08 (-1.87–6.03)   | 0.302  |                      |        |
| Parents attend school meetings | Never        | 14             | 1                             |                |                     |        |                      |        |
|                                | Sometimes    | 137            | 2.11 (-7.57–11.79)            | 0.669          |                     |        |                      |        |
|                                | Always       | 194            | 4.41 (-5.50–14.31)            | 0.383          |                     |        |                      |        |
| Parent make sure do homework   | Never        | 40             | 1                             |                | 1                   |        | 1                    |        |
|                                | Sometimes    | 122            | 1.23 (-5.08–7.54)             | 0.702          | 3.43 (-3.87–10.74)  | 0.357  | 3.85 (-2.18–9.88)    | 0.211  |

|                               |        |     |                    |       |                    |       |                    |       |
|-------------------------------|--------|-----|--------------------|-------|--------------------|-------|--------------------|-------|
|                               | Always | 183 | 2.19 (-4.52–8.91)  | 0.522 | 8.92 (1.62–16.23)  | 0.017 | 6.90 (0.76–13.03)  | 0.028 |
| Family member ill some months | No     | 282 | 1                  |       |                    |       | 1                  |       |
|                               | Yes    | 62  | -3.58 (-8.08–0.93) | 0.119 |                    |       | -2.05 (-6.60–2.51) | 0.378 |
| Miss school to help parents   | No     | 288 | 1                  |       | 1                  |       | 1                  |       |
|                               | Yes    | 53  | -4.02 (-9.17–1.13) | 0.126 | -1.25 (-7.32–4.81) | 0.685 | -3.11 (-8.41–2.20) | 0.251 |
| Sleep in parent house         | No     | 81  |                    |       | 1                  |       |                    |       |
|                               | Yes    | 265 |                    |       | 4.99 (0.31–9.68)   | 0.037 |                    |       |

232 <sup>1</sup> number, <sup>2</sup> confidence interval, <sup>3</sup> p-value, <sup>4</sup> socio-economic status

233 Delay in school grade

234 Of the 659 pupils enrolled, 253 (38.4%) were more than one year older than expected for their  
235 school grade and of these 47 (18.6%) were infected, compared to only 36 of the 406 pupils (8.9%)  
236 who were the expected age. While school grade delay was associated with tungiasis in the  
237 univariable analyses (OR 2.10, 95% CI: 1.12–3.94), several other independent covariables were too,  
238 and it was these variables that were more strongly associated with school grade delay and not  
239 tungiasis (aOR 1.27, 95% CI: 0.58–2.78) (Table 5).

241 Table 5. Logistic regression analysis for delay in school grade (delayed at least one year):

| Variable               | Category     | N <sup>1</sup> | UNIVARIABLE     |                     |       |                | MULTIVARIABLE    |        |       |        |
|------------------------|--------------|----------------|-----------------|---------------------|-------|----------------|------------------|--------|-------|--------|
|                        |              |                | OR <sup>2</sup> | 95% CI <sup>3</sup> |       | P <sup>4</sup> | aOR <sup>5</sup> | 95% CI |       | P      |
| Tungiasis status       | Not infected | 576            | 1               |                     |       |                | 1                |        |       |        |
|                        | Infected     | 83             | 2.10            | 1.12                | 3.94  | 0.022          | 1.27             | 0.58   | 2.78  | 0.549  |
| County                 | Muranga      | 89             | 1               |                     |       |                | 1                |        |       |        |
|                        | Turkana      | 69             | 11.44           | 4.21                | 31.07 | <0.001         | 4.74             | 1.10   | 20.40 | 0.037  |
|                        | Samburu      | 67             | 3.76            | 1.40                | 10.11 | 0.009          | 2.23             | 0.60   | 8.24  | 0.229  |
|                        | Kericho      | 67             | 2.09            | 0.76                | 5.70  | 0.152          | 1.72             | 0.52   | 5.73  | 0.378  |
|                        | Nakuru       | 74             | 1.64            | 0.60                | 4.51  | 0.338          | 1.17             | 0.35   | 3.91  | 0.802  |
|                        | Kajiado      | 73             | 2.07            | 0.76                | 5.60  | 0.153          | 1.91             | 0.56   | 6.49  | 0.300  |
|                        | Makueni      | 72             | 1.46            | 0.54                | 3.96  | 0.453          | 0.88             | 0.26   | 2.98  | 0.833  |
|                        | Taita Taveta | 67             | 1.29            | 0.46                | 3.63  | 0.636          | 0.83             | 0.24   | 2.90  | 0.766  |
| School type            | Kilifi       | 81             | 20.42           | 7.12                | 58.53 | <0.001         | 12.67            | 3.01   | 53.32 | 0.001  |
|                        | Public       | 585            | 1               |                     |       |                |                  |        |       |        |
|                        | Private      | 74             | 0.15            | 0.05                | 0.44  | 0.001          |                  |        |       |        |
| School location        | Urban        | 82             | 1               |                     |       |                |                  |        |       |        |
|                        | Rural        | 577            | 3.19            | 1.20                | 8.50  | 0.020          |                  |        |       |        |
| Age                    |              |                | 1.39            | 1.24                | 1.56  | <0.001         | 1.49             | 1.30   | 1.71  | <0.001 |
| Sex                    | Female       | 323            | 1               |                     |       |                |                  |        |       |        |
|                        | Male         | 336            | 1.47            | 1.00                | 2.16  | 0.049          |                  |        |       |        |
| Disability             | No           | 649            | 1               |                     |       |                |                  |        |       |        |
|                        | Yes          | 10             | 2.44            | 0.46                | 12.90 | 0.294          |                  |        |       |        |
| Other skin abnormality | No           | 617            | 1               |                     |       |                |                  |        |       |        |
|                        | Yes          | 42             | 1.44            | 0.64                | 3.26  | 0.377          |                  |        |       |        |
| Height-for-age         |              |                | 0.70            | 0.60                | 0.82  | <0.001         |                  |        |       |        |
| Weight-for-age         |              |                | 0.77            | 0.67                | 0.89  | <0.001         | 0.72             | 0.59   | 0.87  | 0.001  |
| Days absent            |              |                | 1.10            | 1.04                | 1.17  | 0.001          | 1.11             | 1.04   | 1.19  | 0.002  |

|                                |              |     |      |      |      |        |      |      |      |       |
|--------------------------------|--------------|-----|------|------|------|--------|------|------|------|-------|
| SES <sup>6</sup>               |              |     | 0.22 | 0.14 | 0.35 | <0.001 | 0.42 | 0.21 | 0.83 | 0.013 |
| Adults living with             | Both parents | 473 | 1    |      |      |        |      |      |      |       |
|                                | Other adults | 186 | 1.14 | 0.74 | 1.76 | 0.543  |      |      |      |       |
| Who cares for child            | Mother       | 504 | 1    |      |      |        |      |      |      |       |
|                                | Others       | 153 | 0.75 | 0.47 | 1.19 | 0.219  |      |      |      |       |
| Mother's schooling             | None         | 110 | 1    |      |      |        | 1    |      |      |       |
|                                | Primary      | 181 | 0.69 | 0.36 | 1.33 | 0.264  | 2.15 | 0.87 | 5.28 | 0.095 |
|                                | Secondary    | 254 | 0.56 | 0.28 | 1.10 | 0.092  | 2.63 | 1.01 | 6.84 | 0.048 |
|                                | Don't know   | 108 | 0.69 | 0.33 | 1.47 | 0.341  | 2.26 | 0.80 | 6.35 | 0.122 |
| Father away a lot              | No           | 270 | 1    |      |      |        |      |      |      |       |
|                                | Yes          | 228 | 0.96 | 0.61 | 1.52 | 0.875  |      |      |      |       |
| Mother away a lot              | No           | 410 | 1    |      |      |        |      |      |      |       |
|                                | Yes          | 173 | 0.99 | 0.60 | 1.64 | 0.972  |      |      |      |       |
| Parents attend school meetings | Never        | 38  | 1    |      |      |        |      |      |      |       |
|                                | Sometimes    | 260 | 1.50 | 0.66 | 3.42 | 0.338  |      |      |      |       |
|                                | Always       | 358 | 0.89 | 0.38 | 2.06 | 0.781  |      |      |      |       |
| Parents check homework done    | Never        | 95  | 1    |      |      |        |      |      |      |       |
|                                | Sometimes    | 235 | 0.94 | 0.52 | 1.70 | 0.834  |      |      |      |       |
|                                | Always       | 328 | 0.44 | 0.24 | 0.81 | 0.008  |      |      |      |       |
| Family member ill some months  | No           | 548 | 1    |      |      |        |      |      |      |       |
|                                | Yes          | 108 | 1.06 | 0.63 | 1.78 | 0.824  |      |      |      |       |
| Family member has disability   | No           | 616 | 1    |      |      |        |      |      |      |       |
|                                | Yes          | 37  | 1.52 | 0.66 | 3.49 | 0.326  |      |      |      |       |
| Miss school to help at home    | No           | 548 | 1    |      |      |        | 1    |      |      |       |
|                                | Yes          | 102 | 2.14 | 1.25 | 3.65 | 0.005  | 1.65 | 0.86 | 3.17 | 0.134 |
| Sleep in parents' house        | No           | 133 | 1    |      |      |        |      |      |      |       |
|                                | Yes          | 524 | 0.64 | 0.39 | 1.04 | 0.072  |      |      |      |       |

242 <sup>1</sup> number, <sup>2</sup> odds ratio <sup>3</sup> confidence interval, <sup>4</sup> p-value, <sup>5</sup> adjusted odds ratio <sup>6</sup> socio-economic status

243 **Pain and Itching**

244 All 230 infected pupils identified during both survey 1 and 2 were asked about the amount of pain  
 245 they experienced from the embedded fleas and the amount of itching the fleas caused them in the  
 246 previous one week, scored from 0 (= none) to 3 (= a lot). Univariable models demonstrated that  
 247 pupils with severe tungiasis (more than 10 fleas) were five times more likely to experience higher  
 248 levels of pain than the pupils with mild tungiasis (OR 4.99, 95% CI 2.50–9.99). The same was true for  
 249 itching (OR 5.44, 95% CI 2.65–11.19).

250 **Quality of Life**

251 The domains of the Tungiasis-modified Dermatological Life Quality Index (TmDLQI) with the most  
 252 pupils expressing “some” or “a lot” of impact were shame, disturbed sleep and difficulty  
 253 concentrating at school due to the itching (Table 6). Using panel ordered univariable models it was  
 254 clear mild cases felt the same levels of shame as severe cases. However, pupils with severe tungiasis  
 255 had 4 times higher odds of experiencing higher levels of impact on concentration and mobility (Table  
 256 6). Although the p-values were not less than 0.05, pupils with severe disease had 3 times higher odds  
 257 of experiencing higher levels of bullying and disturbed sleep.

258

259 Table 6. Association of Tungiasis associated-quality-of-life domains for pupils with severe disease  
 260 compared to pupils with mild disease.

| Quality of Life domain               | % scoring “some”<br>or “a lot” of impact | Odds<br>Ratio | 95% Conf.<br>Interval | P-<br>value |
|--------------------------------------|------------------------------------------|---------------|-----------------------|-------------|
| Shame                                | 41.8                                     | 1.15          | 0.31 4.20             | 0.836       |
| Disturbed sleep                      | 35.8                                     | 2.70          | 0.96 7.54             | 0.059       |
| Difficulty concentrating due to itch | 32.8                                     | 4.19          | 1.06 16.48            | 0.041       |
| Feel anger                           | 31.3                                     | 1.25          | 0.42 3.75             | 0.690       |
| Mobility                             | 25.4                                     | 4.15          | 1.29 13.36            | 0.017       |
| Bullying                             | 23.9                                     | 3.43          | 0.94 12.54            | 0.062       |
| Affects friendship                   | 28.4                                     | 0.79          | 0.27 2.34             | 0.674       |
| Feel sad                             | 28.4                                     | 1.37          | 0.42 4.47             | 0.602       |

261

262 When all of the domain scores were summed for each pupil to obtain the TmDLQI score, the  
263 median score was 9 (IQR 4–13) and ranged from 0 to 24 (the maximum possible). When collapsed  
264 into quintiles, 80% of severe cases reported a moderate to very large impact on quality of life  
265 (TmDLQI 6–24), while only 62.5% of mild cases were considered to have this level of impact (Figure  
266 1). Since quality of life could be impacted by many factors in a child’s life, we conducted  
267 multivariable analysis with the same set of explanatory variables as used above with the TmDLQI  
268 quintiles and found pupils with severe tungiasis had a nearly four times higher odds of experiencing  
269 higher category of impact than those with mild tungiasis (aOR 3.52, 95% CI: 1.22–10.17) even when  
270 adjusted for age, and the mother being away a lot (Table 7). The older the child the less the impact,  
271 but children whose mothers were away a lot had 3 times higher odds of experiencing a higher  
272 category of impact.  
273

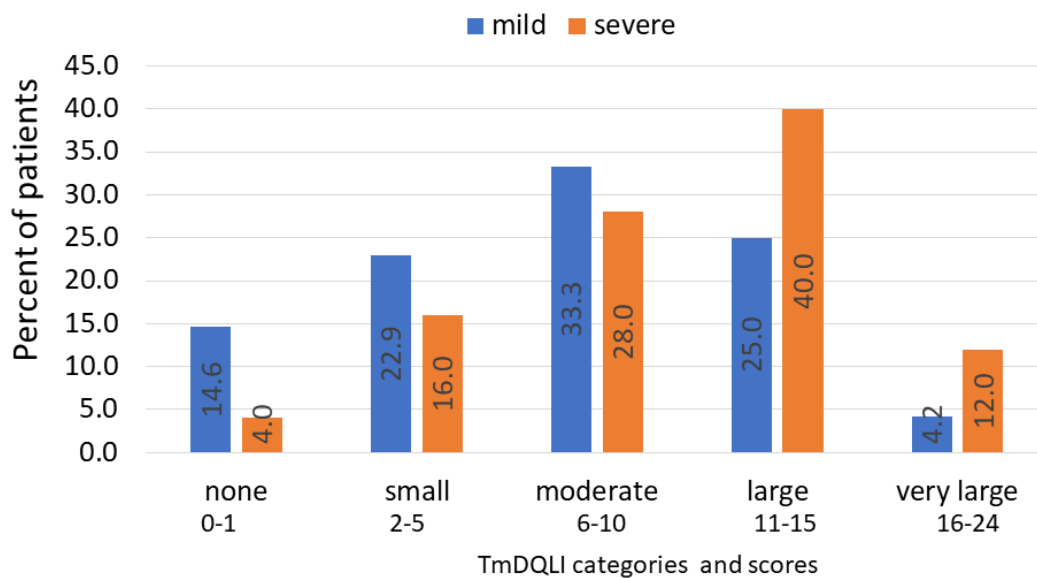

274  
275 Figure 1. Distribution of tungiasis-associated quality-of-life categories by disease severity. Severe  
276 disease: orange bars, mild disease: blue bars.

277 Table 7. Panel Ordered Logistic Regression analysis for tungiasis-associated Quality of Life (TmDLQI) quintiles (categories) for tungiasis patients.

| Variable                      | Category     | N <sup>1</sup> | OR <sup>2</sup> | Univariable         |                |                  | Multivariable |      |       |
|-------------------------------|--------------|----------------|-----------------|---------------------|----------------|------------------|---------------|------|-------|
|                               |              |                |                 | 95% CI <sup>3</sup> | P <sup>4</sup> | aOR <sup>5</sup> | 95% CI        | P    |       |
| Disease severity              | Mild         | 51             | 1               |                     |                | 1                |               |      |       |
|                               | Severe       | 22             | 3.61            | 0.97                | 13.39          | 0.055            | 3.52          | 1.22 | 10.17 |
| County                        | Muranga      | 19             | 1               |                     |                |                  |               |      |       |
|                               | Turkana      | 4              | 0.50            | 0.04                | 6.12           | 0.585            |               |      |       |
|                               | Samburu      | 6              | 3.08            | 0.25                | 37.68          | 0.378            |               |      |       |
|                               | Kericho      | 4              | 4.09            | 0.20                | 83.67          | 0.36             |               |      |       |
|                               | Nakuru       | 8              | 3.84            | 0.38                | 39.14          | 0.256            |               |      |       |
|                               | Kajiado      | 4              | 4.28            | 0.31                | 59.15          | 0.277            |               |      |       |
|                               | Makueni      | 5              | 1.24            | 0.07                | 20.59          | 0.881            |               |      |       |
|                               | Taita Taveta | 1              | -               | -                   | -              | -                |               |      |       |
| Age                           | Kilifi       | 22             | 0.44            | 0.06                | 3.06           | 0.403            |               |      |       |
|                               |              |                | 0.74            | 0.55                | 1.00           | 0.050            | 0.78          | 0.61 | 0.99  |
| Sex                           | Girl         | 29             | 1               |                     |                |                  |               |      |       |
|                               | Boy          | 44             | 0.59            | 0.21                | 1.65           | 0.316            |               |      |       |
| Height-for-age                |              |                | 1.09            | 0.82                | 1.46           | 0.543            |               |      |       |
| Weight-for-age                |              |                | 1.18            | 0.82                | 1.68           | 0.375            |               |      |       |
| SES <sup>6</sup>              |              |                | 1.26            | 0.28                | 5.61           | 0.764            |               |      |       |
| Adults living with            | Both parents | 54             | 1               |                     |                |                  |               |      |       |
|                               | Other adults | 19             | 0.93            | 0.30                | 2.85           | 0.894            |               |      |       |
| Who cares for child           | Mother       | 59             | 1               |                     |                |                  |               |      |       |
|                               | Others       | 14             | 1.28            | 0.34                | 4.79           | 0.709            |               |      |       |
| Family member ill some months | No           | 548            | 1               |                     |                |                  |               |      |       |
|                               | Yes          | 108            | 0.55            | 0.13                | 2.34           | 0.416            |               |      |       |
| Family disability             | No           | 616            | 1               |                     |                |                  |               |      |       |
|                               | Yes          | 37             | 0.48            | 0.03                | 8.81           | 0.618            |               |      |       |
| Father away a lot             | No           | 33             | 1               |                     |                |                  |               |      |       |



|                             |                |    |      |      |       |       |      |      |      |       |
|-----------------------------|----------------|----|------|------|-------|-------|------|------|------|-------|
|                             | Yes            | 27 | 1.69 | 0.53 | 5.36  | 0.376 |      |      |      |       |
| Mother away a lot           | No             | 51 | 1    |      |       |       | 1    |      |      |       |
|                             | Yes            | 21 | 3.45 | 1.14 | 10.45 | 0.029 | 3.03 | 1.11 | 8.24 | 0.030 |
| Mother's schooling          | Some secondary | 21 | 1    |      |       |       |      |      |      |       |
|                             | None           | 7  | 0.34 | 0.03 | 3.43  | 0.359 |      |      |      |       |
|                             | Primary only   | 26 | 1.45 | 0.36 | 5.91  | 0.604 |      |      |      |       |
|                             | Don't know     | 18 | 2.61 | 0.50 | 13.77 | 0.258 |      |      |      |       |
| Source income from job      | No             | 67 | 1    |      |       |       |      |      |      |       |
|                             | Yes            | 10 | 0.55 | 0.11 | 2.86  | 0.481 |      |      |      |       |
| Miss school to help         | No             | 62 | 1    |      |       |       |      |      |      |       |
|                             | Yes            | 13 | 0.41 | 0.11 | 1.48  | 0.172 |      |      |      |       |
| Sleep in parent house       | No             | 11 | 1    |      |       |       |      |      |      |       |
|                             | Yes            | 66 | 2.82 | 0.75 | 10.56 | 0.125 |      |      |      |       |
| # People sleep in same room |                |    | 1.11 | 0.99 | 1.25  | 0.072 |      |      |      |       |

278 <sup>1</sup> number, <sup>2</sup> odds ratio <sup>3</sup> confidence interval, <sup>4</sup> p-value, <sup>5</sup> adjusted odds ratio <sup>6</sup> socio-economic status

## Discussion

Few of the countries endemic for tungiasis have a national control strategy. This is in part due to lack of data on the disease burden and evidence-based interventions, but also a lack of appreciation for the impact the disease has on those who are infected. Here we attempted to quantify the impact with the aim of generating evidence to advocate for the disease to be put on local, national and international agendas.

The study found that tungiasis infection is negatively associated with weight-for-age, with higher levels of school absenteeism and lower exam scores among pupils in the younger classes. Children with severe tungiasis had higher levels of pain and itching, and a reduced quality of life, particularly as regards mobility, concentration in school and disturbed sleep, than children with mild tungiasis.

The most striking impact identified in this study was the very poor academic achievement of infected pupils in grade one to four in all three exam subjects compared to uninfected peers, even when adjusted for other factors that can influence school performance, including absenteeism which was independently associated with tungiasis. This aligns with what has been reported for other diseases. Previously children with repeated episodes of malaria[21, 22] or with helminth infections [23, 24] have been found to have lower school attendance, learning ability, memory and academic achievement. It is quite possible that our result could have been confounded by the children in our study being co-infected with these other diseases since we did not test for them. While the comparison group of uninfected pupils may have controlled for this, it is possible the diseases cluster in the same children. Future studies on academic impact should test pupils for malaria and helminth infections as well as tungiasis.

Another factor that could be a confounder in the association with school performance is malnutrition, low height-for-age (stunting) and weight-for-age (underweight), both of which have previously been associated with poor academic achievement [25-27]. However, in the current study only height-for-age was positively associated with math scores in the lower grades in this study and did not confound the association with tungiasis, so we find it likely that tungiasis independently affects children's school performance.

Stunting is thought to be caused by chronic under-nutrition and is associated with poor neurological and cognitive development and therefore learning ability and academic achievement[28, 29]. It is possible that the chronic pain leads to poor nutritional intake, but also possible that poverty is a causal factor that confounds the association between nutrition and tungiasis. The mechanism of action for tungiasis infection on poor school performance needs to be explored further but could be related to the inflammation induced by the embedded fleas causing extreme pain and itching as demonstrated in this study, particularly children with severe disease. This in turn affects mobility, sleep, concentration in class, and social exclusion as seen in the quality-of-life assessments and ability to attend school, which could all impact cognitive development and learning. In fact findings of ours from another study demonstrated school children with tungiasis did have impaired cognitive development compared to their uninfected peers[30].

All of these factors are interconnected in a vicious cycle as illustrated in Figure 2, possibly trapping children into a life of poverty[2] which puts them at greater risk of tungiasis. The mechanism of association of tungiasis with weight-for-age even when adjusted for SES needs further investigation but may be a result of this cascade. The embedded fleas and the associated itching and mental state may affect a child's appetite, or the fleas could be depriving the host of essential nutrients, particularly those with a high infection intensity.

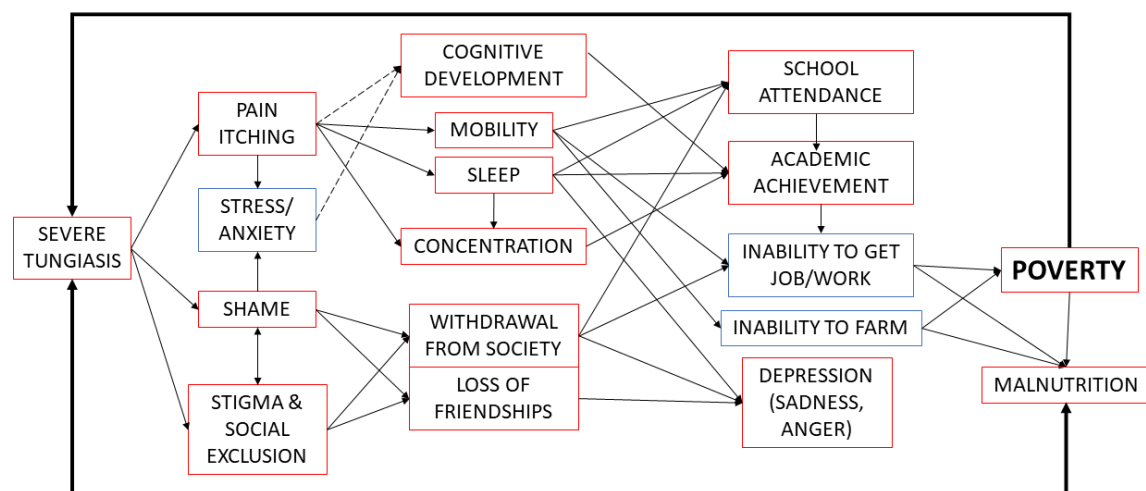

Figure 2. The network of impacts of tungiasis trapping people in poverty. Red boxes documented impacts, blue boxes anecdotal reports, solid arrows: likely pathway, broken arrow: possible pathway.

The proportion of infected pupils (68.5%) who reported a moderate to very high impact on their TmDLQI was similar to the previous small tungiasis study in Kenya (78%)[13] and a study of cutaneous larva migrans in Brazil (71%) [31], which were higher than that reported for scabies (45%) [32], suggesting tungiasis has a higher impact on the quality of life of children than does scabies, another skin disease caused by an arthropod. Each of these studies used a disease-specific, modified version of the general CDLQI[17]. Both Kenyan tungiasis studies identified sleep disturbance and concentration in school as the most affected domains which have been shown to lead to poor cognitive development[33], learning and memory[34] as well as depression[35].

We have recently proposed a new classification of disease severity for tungiasis using a 10-flea threshold. The fact that children with severe tungiasis in this randomly selected population from multiple geographic areas and cultures across Kenya expressed five times higher levels of pain and itching and a higher impact on quality of life, mobility and concentration confirms this is a clinically relevant classification for future use in other studies, and for targeting and monitoring interventions.

There were several possible limitations to this study. One limitation of the academic outcome is the possibility that the scoring system for this age group by teachers could be subjective and biased. However, the schools were selected randomly and were from nine different counties across Kenya and it is unlikely all the teachers would have the same bias. Using the school as a random effect in the models should also control for this. If this association reflects a negative bias of teachers against pupils with tungiasis rather than an actual difference in academic achievement, that would also be an important outcome and barrier to these children's development which would require interventions. Further studies to investigate this might be warranted.

Another limitation is that participants were selected from children who were attending school on the day of the surveys. The most heavily infected children in the community may have been absent from school on that day on account of the disease and may miss more days of school due to their infection. If we had enrolled such children, we would expect to have seen even higher impacts on absenteeism rates and even lower exam scores.

The lack of association of tungiasis with exam scores in the older age group (grade 5 to 8) may well be the result of the very small number of cases enrolled in the study. Ideally this study should be repeated in public schools only and enrolling an equal number of cases and controls, across all school grades into a longitudinal study to determine whether older pupils also have lower exam scores and whether the impact seen at the younger age affects achievement in later years.

Lastly, although we examined the pupils for other skin diseases, we did not test them for diseases such as malaria and intestinal helminths which could have confounded several of our outcomes including absenteeism, school grade delay and school performance. However, the considerably larger number of controls and their random selection from randomly selected schools across the nine counties in the study should have gone some way to counter this.

In conclusion, our study has demonstrated that tungiasis has considerable impact on many aspects of the lives and development of children, just as has been documented for malaria and helminth infections.

Diagnosis, surveillance and disease management for children with tungiasis urgently needs to be integrated into the existing platforms created for these other diseases, in line with the WHO Road map for Neglected Tropical Diseases[36]. Only by addressing all of the diseases impacting these marginalized children will they have an equal opportunity to develop alongside their uninfected peers.

### [Ethics approval and consent to participate.](#)

The study was approved by the KEMRI Scientific and Ethics Review Committee (approval number KEMRI/SERU/CGMR-C/170/3895) as well as the Oxford Tropical Research Ethics Committee (reference number 38-19). The study was conducted in accordance with the Helsinki Declaration. During the community engagement phase, a presentation was made to the national Director for Neglected Tropical Diseases at the Ministry of Health, the county and sub-county health management teams and the department of education in all counties to obtain their approval. In each school a meeting was held with the school parent teachers' association (PTA) or management board to obtain their permission to conduct the survey in their school. The head teacher and PTA chairperson signed the consent form on behalf of the parents and school for the pupils to be examined. Each child gave verbal assent. Community health workers were hired and trained in each school to assist and be the link with the community emphasizing that participation was completely voluntary, and subjects had the opportunity to withdraw from the study at any point in the study.

For pupils selected for interviews, these were explained, and each was given an information leaflet to take home for their parents along with an opt-out form. Parents were to sign and return the form only if they did not want their child to participate in the interviews, or they could attend the school the next day to clarify any issues they may have. On the following day, if the selected pupils did not have the opt out form and were willing to participate, they proceeded with the interviews.

All data were collected on PIN protected electronic tablets, stored on password protected RedCap databases on the KEMRI-Wellcome Trust servers. Data were analyzed after export to Excel spreadsheets without inclusion of personal identifiers.

All pupils with tungiasis were referred for treatment to the community health workers or the local health facility using benzyl benzoate provided by the study. For those with secondary bacterial infection and other illnesses requiring treatment, a referral was made to the nearest health facility.

### Consent for publication

Not applicable

### Data Availability

The datasets and other materials supporting the conclusions of this article are available on KWTRP Research Data Repository at Harvard Dataverse through the following

link: <https://doi.org/10.7910/DVN/DFSTIZ>

Elson Tungiasis Impact dataset

### Supporting Information

SI 1. Table of participant distribution by covariates and disease status

SI 2. Univariable Regression tables for pupil exam results in Maths, English and Science

SI 3. Frequency histogram of TmDLQI with quintile thresholds.

### Competing interests

All authors declare no conflict of interest.

### Funding Information

Research funding for this work was provided by the Wellcome Trust (<https://wellcome.org/>) through the project “Epidemiology of Tungiasis” (grant number 213724/Z/18/) granted to Lynne Elson as a Career Re-Entry Fellowship. This work was written with the permission of Director KEMRI-CGMRC. The views expressed herein do not necessarily reflect the official opinion of the donors. The funders had neither a role in the design of the study, nor in collection, analysis, interpretation of data nor in writing the manuscript.

## Author Contributions

Conceptualization, LE, UF; Methodology, LE, UF, BO; Formal Analysis, LE, BO; Investigation, LE, CK, SK, CM, MO, ES, ES, JK, EM, MW, JL; Resources, LE, PB; Data Curation, LE ; Writing – Original Draft Preparation, LE.; Writing – Review & Editing, UF,BO, PB; Visualization, LE.; Supervision, PB; Project Administration, LE, PB; Funding Acquisition, LE, PB.

## Acknowledgements

We are grateful to the communities who participated, the school Parent Teacher Associations and Head Teachers who allowed us to work in their schools, the county Directors of Health and Education who gave their approval for the study and assisted in many ways to ensure its success.

## Abbreviations

aOR adjusted Odds Ratio

aIRR adjusted incidence rate ratio

CDLQI Children’s dermatological life quality index

CI Confidence Interval

IQR inter-quartile range

KEMRI Kenya Medical Research Institute

NTDs Neglected Tropical Diseases

OR Odds ratio

SES Socio-economic status

TmDLQI Tungiasis modified life quality index

WHO World Health Organisation



## References

1. Heukelbach J, de Oliveira FA, Hesse G, Feldmeier H. Tungiasis: a neglected health problem of poor communities. *Trop Med Int Health*. 2001;6(4):267-72. Epub 2001/05/12. PubMed PMID: 11348517.
2. Elson L, Kamau C, Koech S, Muthama C, Gachomba G, Sinoti E, et al. National prevalence and risk factors for tungiasis in Kenya. *BMC-IDOP*. 2023.
3. Mutebi F, McNeilly H, Thielecke M, Reichert F, Wiese S, Mukone G, et al. Prevalence and Intensity of Human and Animal Tungiasis in Napak District, Karamoja, Northeastern Uganda. *Trop Med Infect Dis*. 2023;8(2). Epub 2023/02/25. doi: 10.3390/tropicalmed8020111. PubMed PMID: 36828527; PubMed Central PMCID: PMC9963877.
4. Elson L, Wiese S, Feldmeier H, Fillinger U. Prevalence, intensity and risk factors of tungiasis in Kilifi County, Kenya II: Results from a school-based observational study. *PLoS Negl Trop Dis*. 2019;13(5):e0007326. Epub 2019/05/17. doi: 10.1371/journal.pntd.0007326. PubMed PMID: 31095558.
5. Muehlen M, Heukelbach J, Wilcke T, Winter B, Mehlhorn H, Feldmeier H. Investigations on the biology, epidemiology, pathology.II. Prevalence, parasite load and topographic distribution of lesions. *Parasitol Res*. 2003;90:449–55.
6. Girma M, Astatkie A, Asnake S. Prevalence and risk factors of tungiasis among children of Wensho district, southern Ethiopia. *BMC Infect Dis*. 2018;18(1):456. Epub 2018/09/12. doi: 10.1186/s12879-018-3373-5. PubMed PMID: 30200882; PubMed Central PMCID: PMC6131746.
7. Feldmeier H, Heukelbach J, Ugbomoiko US, Sentongo E, Mbabazi P, von Samson-Himmelstjerna G, et al. Tungiasis--a neglected disease with many challenges for global public health. *PLoS Negl Trop Dis*. 2014;8(10):e3133. Epub 2014/10/31. doi: 10.1371/journal.pntd.0003133. PubMed PMID: 25356978; PubMed Central PMCID: PMC4214674.
8. Eisele M, Heukelbach J, Van Marck E, Mehlhorn H, Meckes O, Franck S, et al. Investigations on the biology, epidemiology, pathology and control of *Tunga penetrans* in Brazil: I. Natural history of tungiasis in man. *Parasitol Res*. 2003;90(2):87-99. Epub 2003/05/21. doi: 10.1007/s00436-002-0817-y. PubMed PMID: 12756541.

9. Feldmeier H, Eisele M, Saboia-Moura RC, Heukelbach J. Severe tungiasis in underprivileged communities: case series from Brazil. *Emerg Infect Dis*. 2003;9(8):949-55. Epub 2003/09/12. doi: 10.3201/eid0908.030041. PubMed PMID: 12967492; PubMed Central PMCID: PMC3020603.
10. Feldmeier H, Heukelbach J, Eisele M, Sousa AQ, Barbosa LM, Carvalho CB. Bacterial superinfection in human tungiasis. *Trop Med Int Health*. 2002;7(7):559-64. Epub 2002/07/09. PubMed PMID: 12100437.
11. L D. Three years in savage Africa. London: Methuen; 1898.
12. Ngunjiri J, Keiyoro PN, Mwanda W. Impact of Tungiasis on acquisition of basic education among children aged 5-14 years in. *International Journal of Scientific Research and Innovative Technology*. 2015;2(6):128-42.
13. Wiese S, Elson L, Feldmeier H. Tungiasis-related life quality impairment in children living in rural Kenya. *PLoS Negl Trop Dis*. 2018;12(1):e0005939. Epub 2018/01/09. doi: 10.1371/journal.pntd.0005939. PubMed PMID: 29309411; PubMed Central PMCID: PMC5757912.
14. NOKES C, GRANTHAM-McGREGOR S, SAWYER A, COOPER E, ROBINSON B, BUNDY D. Moderate to heavy infections of *Trichuris trichiura* affect cognitive function in Jamaican school children. *Parasitology*. 1992;104:539-47.
15. Vidmar SI, Cole T, Pan H. Standardizing Anthropometric Measures in Children and Adolescents with Functions for Egen: Update. *Stata Journal* 2013;13.2:366–78. doi: 10.1177/1536867x1301300211.
16. Lewis-Jones MS, Finlay AY. The Children's Dermatology Life Quality Index (CDLQI): initial validation and practical use. *Br J Dermatol*. 1995;132(6):942-9. doi: 10.1111/j.1365-2133.1995.tb16953.x. PubMed PMID: 7662573.
17. Waters A SD, Beattie P, Ezughah F, Lewis-Jones S. Severity stratification of Children's Dermatology Life Quality Index (CDLQI) scores 2010 [cited 2022]. Available from: <https://www.cardiff.ac.uk/medicine/resources/quality-of-life-questionnaires/childrens-dermatology-life-quality-index>.

18. Elson L, Matharu AK, Riithi N, Ouma P, Mutebi F, Feldmeier H, et al. Characterization of tungiasis infection and morbidity using thermography in Kenya revealed higher disease burden during COVID-19 school closures. *Infectious Diseases of Poverty*. 2023;12(1):24. doi: 10.1186/s40249-023-01080-5.
19. Lynne Elson CK, Sammy Koech et al. National prevalence and risk factors for tungiasis in Kenya. *BMC IDOP*. 2023;PREPRINT (Version 1). doi: <https://doi.org/10.21203/rs.3.rs-3147843/v1>.
20. Dziura JD, Post, L. A., Zhao, Q., Fu, Z., & Peduzzi, P. . Strategies for dealing with missing data in clinical trials: from design to analysis. *The Yale journal of biology and medicine*. 2013;86(3):343.
21. Fernando S, Gunawardena, D., Bandara, M., Silva, D., Carter, R., Mendis, K., & Wickremasinghe, A. . The impact of repeated malaria attacks on the school performance of children. *The American journal of tropical medicine and hygiene*. 2003;69(6):582-8. doi: <https://doi.org/10.4269/AJTMH.2003.69.582>.
22. Vitor-Silva S, Reyes-Lecca, R., Pinheiro, T., & Lacerda, M. Malaria is associated with poor school performance in an endemic area of the Brazilian Amazon. . *Malaria Journal*. 2009;8:230. doi: <https://doi.org/10.1186/1475-2875-8-230>.
23. Ezeamama AE, Bustinduy AL, Nkwata AK, Martinez L, Pabalan N, Boivin MJ, et al. Cognitive deficits and educational loss in children with schistosome infection-A systematic review and meta-analysis. *PLoS Negl Trop Dis*. 2018;12(1):e0005524. Epub 20180112. doi: 10.1371/journal.pntd.0005524. PubMed PMID: 29329293; PubMed Central PMCID: PMC5766129.
24. Pabalan N, Singian E, Tabangay L, Jarjanazi H, Boivin MJ, Ezeamama AE. Soil-transmitted helminth infection, loss of education and cognitive impairment in school-aged children: A systematic review and meta-analysis. *PLoS Negl Trop Dis*. 2018;12(1):e0005523. Epub 20180112. doi: 10.1371/journal.pntd.0005523. PubMed PMID: 29329288; PubMed Central PMCID: PMC5766095.
25. Haywood X, Pienaar AE. Long-Term Influences of Stunting, Being Underweight, and Thinness on the Academic Performance of Primary School Girls: The NW-CHILD Study. *Int J Environ Res Public Health*. 2021;18(17). Epub 20210826. doi: 10.3390/ijerph18178973. PubMed PMID: 34501563; PubMed Central PMCID: PMC8431266.

26. Beckmann J, Lang C, du Randt R, Gresse A, Long KZ, Ludyga S, et al. Prevalence of Stunting and Relationship between Stunting and Associated Risk Factors with Academic Achievement and Cognitive Function: A Cross-Sectional Study with South African Primary School Children. *Int J Environ Res Public Health*. 2021;18(8). Epub 20210416. doi: 10.3390/ijerph18084218. PubMed PMID: 33923436; PubMed Central PMCID: PMC8072858.
27. Zerga AA, Tadesse SE, Ayele FY, Ayele SZ. Impact of malnutrition on the academic performance of school children in Ethiopia: A systematic review and meta-analysis. *SAGE Open Med*. 2022;10:20503121221122398. Epub 20220920. doi: 10.1177/20503121221122398. PubMed PMID: 36161209; PubMed Central PMCID: PMC9500247.
28. Grantham-McGregor SM, Ani CC. Undernutrition and mental development. *Nestle Nutr Workshop Ser Clin Perform Programme*. 2001;5:1-14; discussion -8. doi: 10.1159/000061844. PubMed PMID: 11510433.
29. Frongillo EJ. Symposium: causes and etiology of stunting. Introduction. *J Nutr*. 1999;129:529S–30S.
30. Otieno B, Elson L, Matharu AK, Riithi N, Chongwo E, Katana K, et al. Neurocognitive and mental health outcomes in children with tungiasis: a cross-sectional study in rural Kenya and Uganda. *Infectious Diseases of Poverty*. 2023;12(1):100. doi: 10.1186/s40249-023-01154-4.
31. Schuster A, Lesshaft H Fau - Talhari S, Talhari S Fau - Guedes de Oliveira S, Guedes de Oliveira S Fau - Ignatius R, Ignatius R Fau - Feldmeier H, Feldmeier H. Life quality impairment caused by hookworm-related cutaneous larva migrans in resource-poor communities in Manaus, Brazil. *PLoS Negl Trop Dis* 2011;5(1935-2735 (Electronic)):e1355 doi: 10.1371/journal.pntd.0001355.
32. Worth C, Heukelbach J Fau - Fengler G, Fengler G Fau - Walter B, Walter B Fau - Liesenfeld O, Liesenfeld O Fau - Feldmeier H, Feldmeier H. Impaired quality of life in adults and children with scabies from an impoverished community in Brazil. (1365-4632 (Electronic)).
33. Honn KA, Halverson T, Jackson ML, Krusmark M, Chavali VP, Gunzelmann G, et al. New insights into the cognitive effects of sleep deprivation by decomposition of a cognitive throughput task. *Sleep*. 2020;43(7):zsz319. doi: 10.1093/sleep/zsz319. PubMed PMID: 32227081.

34. Newbury CR, Crowley R, Rastle K, Tamminen J. Sleep deprivation and memory: Meta-analytic reviews of studies on sleep deprivation before and after learning. *Psychol Bull.* 2021;147(11):1215-40. doi: 10.1037/bul0000348. PubMed PMID: 35238586.
35. Saksvik-Lehouillier I, Saksvik SB, Dahlberg J, Tanum TK, Ringen H, Karlsen HR, et al. Mild to moderate partial sleep deprivation is associated with increased impulsivity and decreased positive affect in young adults. *Sleep.* 2020;43(10):zsaa078. doi: 10.1093/sleep/zsaa078. PubMed PMID: 32306048.
36. World\_Health\_Organization. Ending the neglect to attain the Sustainable Development Goals: a road map for neglected tropical diseases 2021–2030. Geneva: World Health Organization 2020.
